# Supplementary material
Source: PubMed Central journal article supplement (PMC9669237)
Supplement: NIHMS1841029-supplement-1.pdf [file NIHMS1841029-supplement-1.pdf]

# Supplemental Figure 1

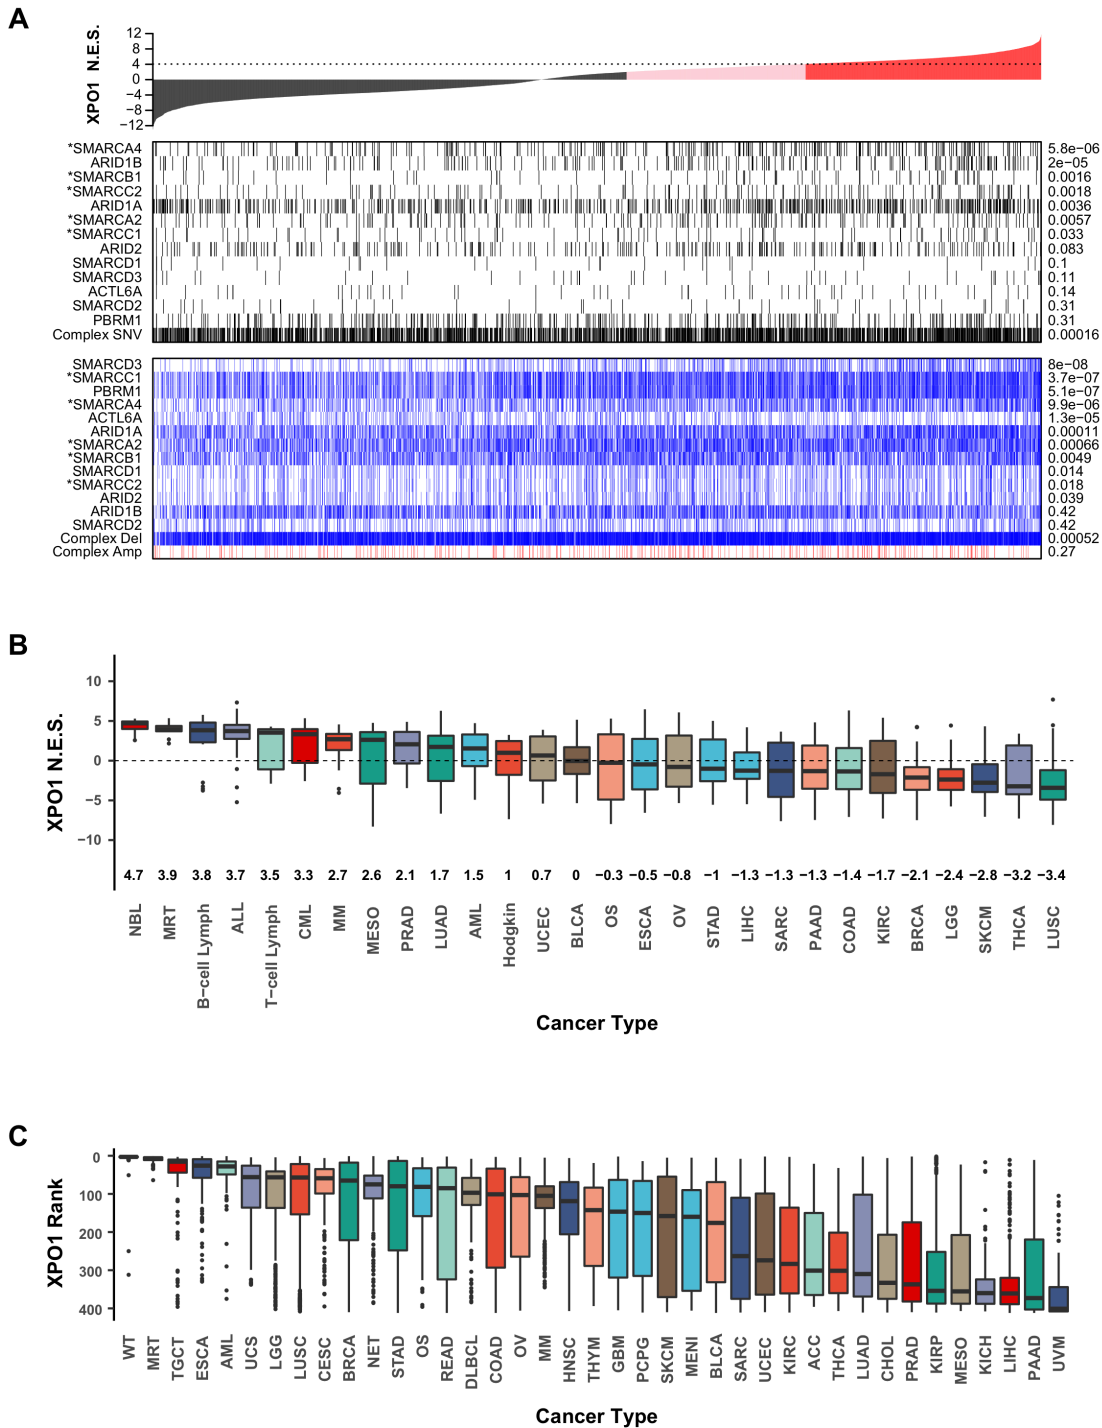

**Figure S1. XPO1 activity across different tumor types and cell line models [Related to Figure 1].** A) Co-segregation analysis of SNV and CNV events in SWI/SNF complex genes with XPO1 activity. XPO1 activation occurs in association with mutations in SWI/SNF complex. Oncoprint (top) describing single nucleotide variants (SNVs) in SWI/SNF complex genes and in core subunits (SMARCA4 and SMARCB1, ARID1B) co-segregate with XPO1 activation. Estimated p-values from enrichment analysis are to the right. Oncoprint (bottom): CNV are more common than SNVs in SWI/SNF complex genes. Heterozygous (light blue) and homozygous (dark blue) deletions in several SWI/SNF complex genes cosegregate with increased XPO1 activity, as do amplifications (red). B) Boxplots representing the distribution of metaVIPER inferred XPO1 activity in a cohort of nine rhabdoid (MRT and ATRT) cell lines compared to 27 cohorts of cancer cell lines profiled in the publicly available CCLE. The median and interquartile range for NES values is represented by each box for the respective cell line cohort. NES values from enrichment analysis are comparable to Z-scores, with higher scores representing increased activity. C) XPO1 prediction rank for each TCGA/TARGET cohort.

Supplemental Figure 2

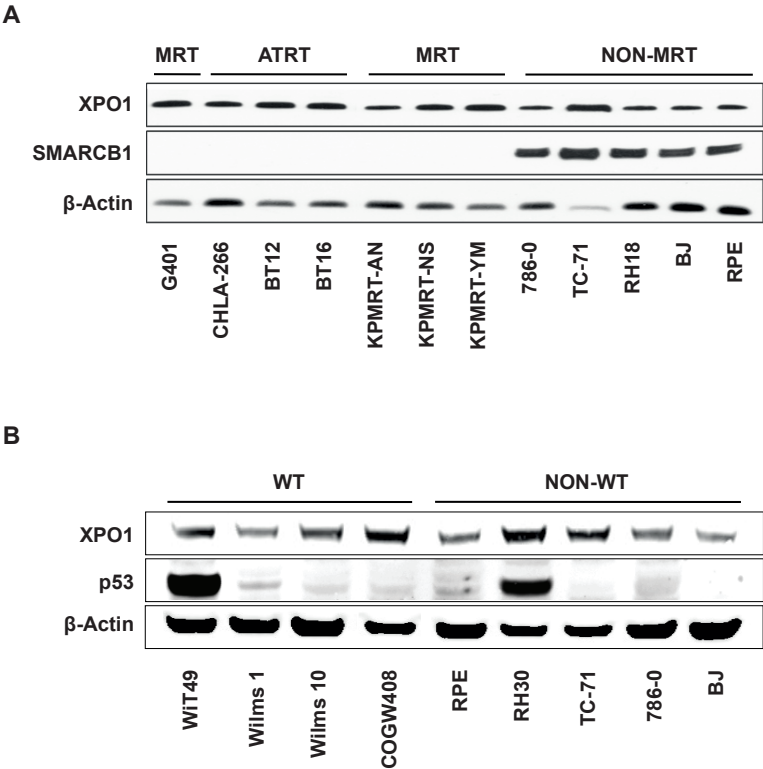

**Figure S2. XPO1 protein expression across MRT, WT, and control cell lines [Related to Figure 2].** A) Protein expression of XPO1 and SMARCB1 across MRT, ATRT, and non-MRT cell lines. B) Protein expression of XPO1 and p53 across Wilms tumor and non-Wilms tumor cell lines. The non-MRT and non-WT cell lines comprise both malignant (786-0 – renal cell carcinoma, TC-71 – Ewing sarcoma, RH18 – Fusion positive rhabdomyosarcoma, RH30 – Fusion positive rhabdomyosarcoma) and non-malignant cell lines (BJ - fibroblast, RPE – TERT-immortalized retinal pigment epithelial cell).

## Supplemental Figure 3

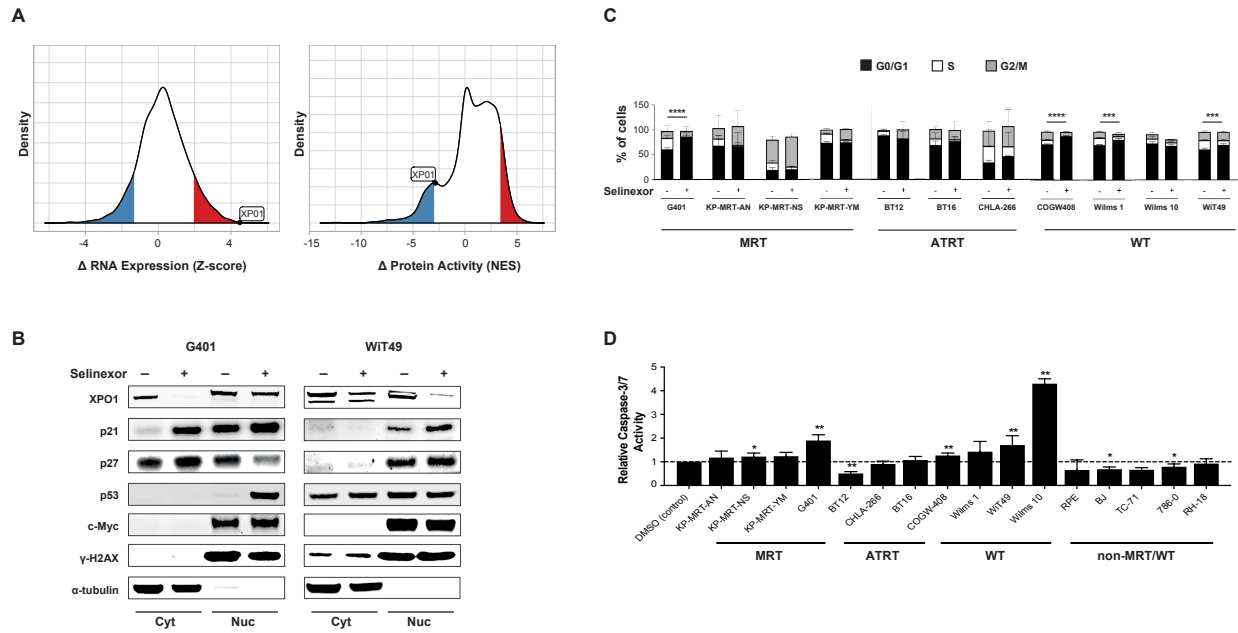

**Figure S3. Effect of XPO1 pharmacological inhibition in MRT and WT cell lines [Related to Figure 2].** A) Change in mRNA (left) and the change in protein activity (right) of XPO1 following treatment with selinexor. Reduction in XPO1 inferred activity was noted along with a compensatory increase in XPO1 mRNA expression following treatment. B) Immunoblot showing expression levels and subcellular localization of XPO1 targets in G401 and WIT49 cell lines treated with selinexor. C) Cell cycle analysis of MRT and WT cell lines treated with DMSO (-) or selinexor (+). D) Relative caspase activity of MRT, WT and non- MRT/WT cell lines treated with selinexor. \*= $p < 0.05$ , \*\*= $p < 0.01$ , \*\*\*= $p < 0.001$ , \*\*\*\*= $p < 0.0001$ .

Supplemental Figure 4

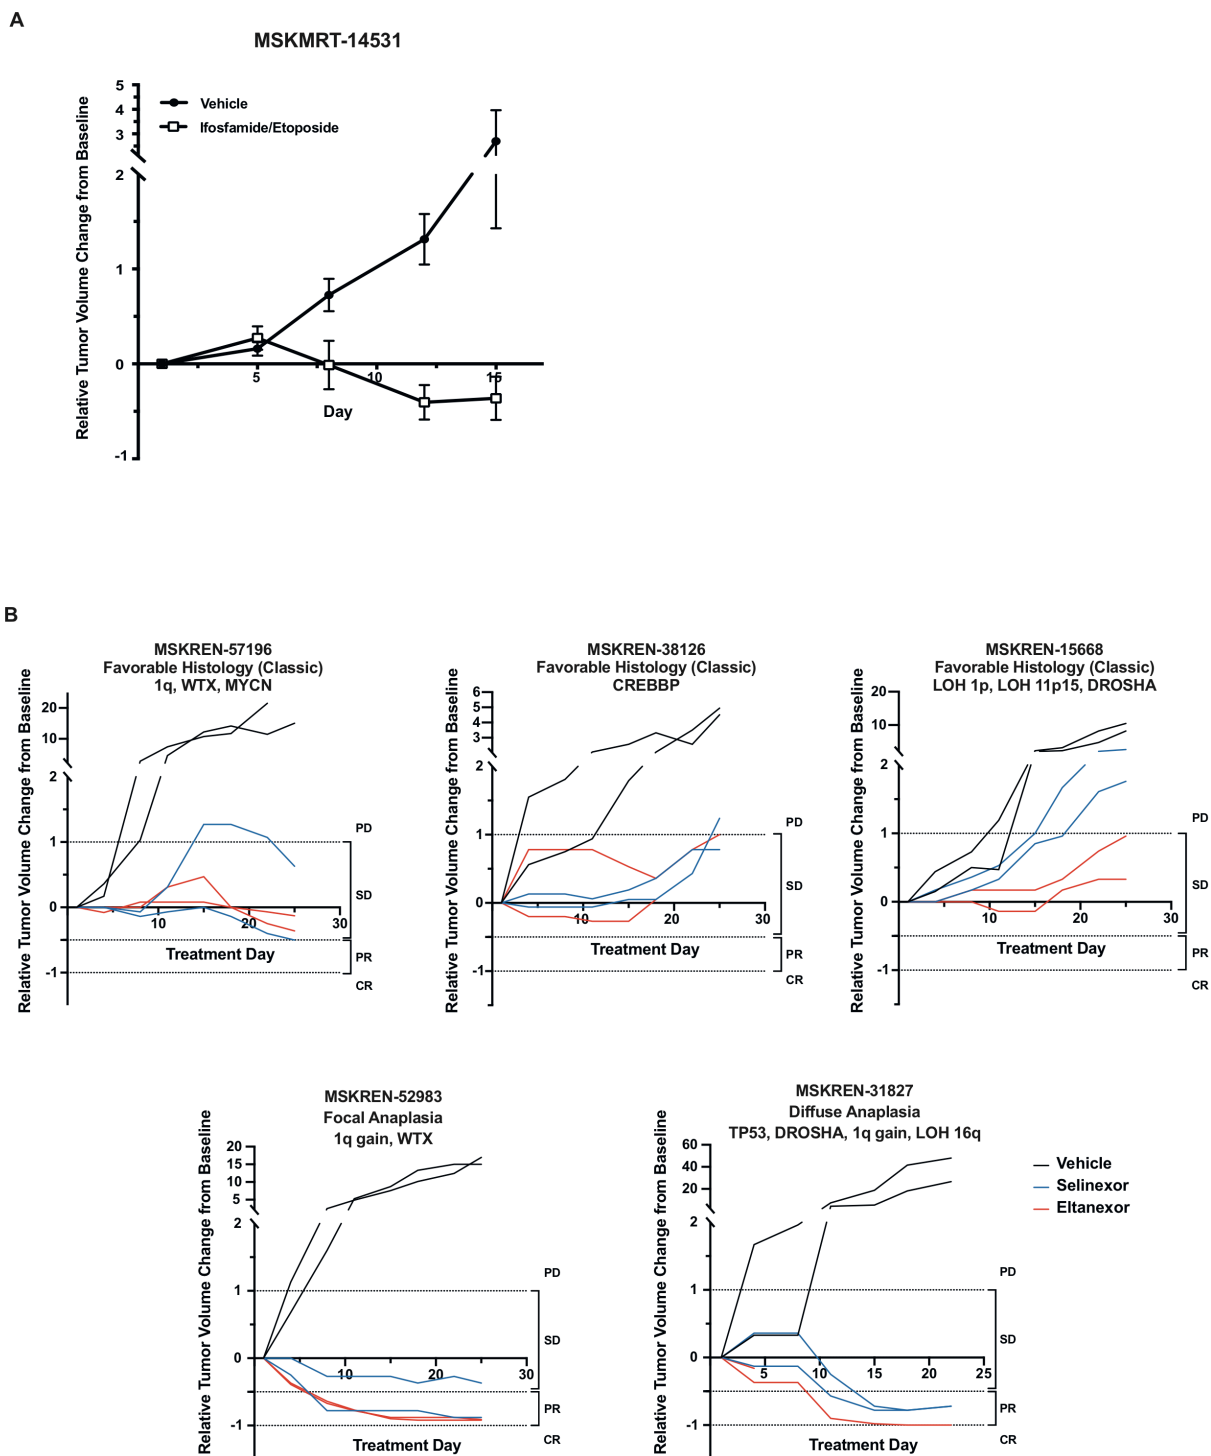

**Figure S4. Tumor response of MRT and WT PDX models treated with selinexor and eltanexor [Related to Figures 3 and 4].** A) Tumor response of MRT (MSKMRT-14531) PDX treated with ifosfamide/etoposide for 15 days. Error bars: SEM. B) Relative tumor volume changes in Wilms tumor PDX models following treatment with selinexor (blue), eltanexor (red), or vehicle (black).

# Supplemental Figure 5

A

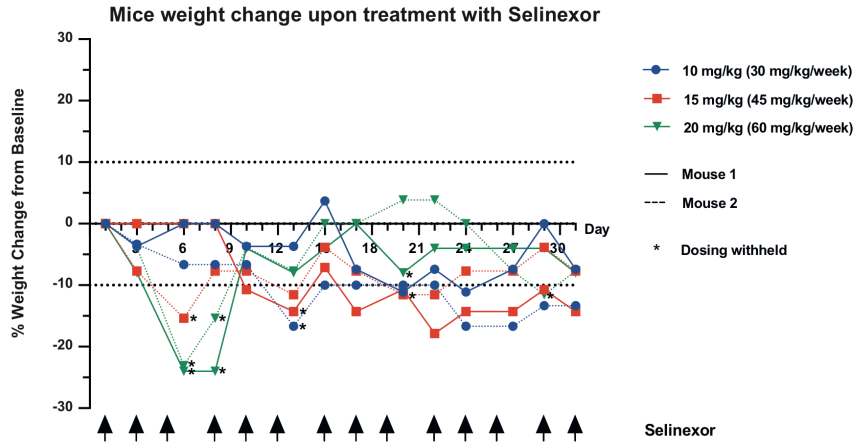

B

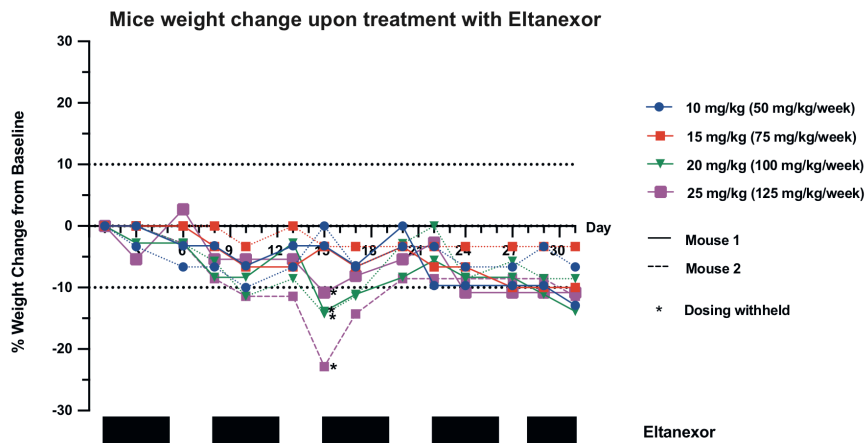

**Figure S5. Tolerability of selinexor and eltanexor [Related to Figures 3 and 4].** Two mice were treated at each dose level for 31 days. A) Mice receiving selinexor were treated with thrice weekly dosing on a Monday, Wednesday, and Friday schedule. B) Mice receiving eltanexor were treated daily Monday through Friday. Asterisk denotes days on which doses were held.

**Supplemental Table 1. Cell line characteristics [Related to Figure 2 and STAR Methods].**

| <b>Cell line</b> | <b>Disease/Tissue</b>                    | <b>TP53 status</b> | <b>IC<sub>50</sub> Selinexor (nM)</b> |
|------------------|------------------------------------------|--------------------|---------------------------------------|
| COGW408          | Wilms tumor (WT)                         | Wild type          | 114                                   |
| Wilms 1          | Wilms tumor (WT)                         | Wild type          | 91                                    |
| Wilms 10         | Wilms tumor (WT)                         | Wild type          | 26                                    |
| WiT49            | Wilms tumor (WT)                         | Mutant             | 207                                   |
| KP-MRT-AN        | Malignant Rhabdoid Tumor (MRT)           | Wild type          | 143                                   |
| KP-MRT-NS        | Malignant Rhabdoid Tumor (MRT)           | Mutant             | 296                                   |
| KP-MRT-YM        | Malignant Rhabdoid Tumor (MRT)           | Wild type          | 89                                    |
| G401             | Malignant Rhabdoid Tumor (MRT)           | Mutant             | 141                                   |
| CHLA-266         | Atypical Teratoid Rhabdoid Tumors (ATRT) | Mutant             | 368                                   |
| BT12             | Atypical Teratoid Rhabdoid Tumors (ATRT) | Mutant             | 1900                                  |
| BT16             | Atypical Teratoid Rhabdoid Tumors (ATRT) | Wild type          | 445                                   |
| BJ               | Fibroblast                               | -                  | 48000                                 |
| RPE              | Retinal Pigment Epithelium               | -                  | 16500                                 |
| RH-18            | Rhabdomyosarcoma                         | Wild type          | -                                     |
| RH-30            | Rhabdomyosarcoma                         | Mutant             | 122                                   |
| TC-71            | Ewing sarcoma                            | Mutant             | 515                                   |
| 786-O            | Renal adenocarcinoma                     | Mutant             | 280                                   |

**Supplemental Table 2. Summary of molecular alterations in MRT and WT models [Relate to STAR Methods].**

| Cell line / PDX | Gene              | Protein Change    | Mutation Type          | VAF (%)           |
|-----------------|-------------------|-------------------|------------------------|-------------------|
| BT12            | <i>ALOX12B</i>    | -                 | CNA_DeepDel            | -                 |
|                 | <i>APC</i>        | A735V             | Missense_Mutation      | 24.7              |
|                 | <i>APC</i>        | -                 | CNA_Amp                | -                 |
|                 | <i>ARID1B</i>     | P450dup           | In_Frame_Ins           | 22.8              |
|                 | <i>ARID1B</i>     | I1602T            | Missense_Mutation      | 54.1              |
|                 | <i>ARID2</i>      | I1322F            | Missense_Mutation      | 49.1              |
|                 | <i>AURKB</i>      | -                 | CNA_DeepDel            | -                 |
|                 | <i>GPS2</i>       | -                 | CNA_DeepDel            | -                 |
|                 | <i>JAK2</i>       | I1051T            | Missense_Mutation      | 45.4              |
|                 | <i>MAP2K1</i>     | R49C              | Missense_Mutation      | 48.6              |
|                 | <i>PLCG2</i>      | A133V             | Missense_Mutation      | 47.4              |
|                 | <i>SMARCB1</i>    | R60Efs*10         | Frame_Shift_Del        | 92.2              |
|                 | <i>TP53</i>       | -                 | CNA_DeepDel            | -                 |
|                 | <i>ZRSR2</i>      | S447_R448dup      | In_Frame_Ins           | 25                |
|                 | BT16              | <i>BRCA1</i>      | T374I                  | Missense_Mutation |
| <i>FOXA1</i>    |                   | H168Q             | Missense_Mutation      | 47.6              |
| <i>HGF</i>      |                   | X209_splice       | Splice_Site            | 46.4              |
| <i>IRS2</i>     |                   | S144T             | Missense_Mutation      | 48.6              |
| <i>MSH3</i>     |                   | A61_P63dup        | In_Frame_Ins           | 36.9              |
| <i>PIK3CB</i>   |                   | H492R             | Missense_Mutation      | 44.6              |
| <i>SMARCB1</i>  |                   | M27Rfs*28         | Frame_Shift_Del        | 100.0             |
| <i>SMO</i>      |                   | L23dup            | In_Frame_Ins           | 33.9              |
| CHLA-226        | <i>ARID1B</i>     | P450dup           | In_Frame_Ins           | 15.9              |
|                 | <i>ERBB4</i>      | A1236V            | Missense_Mutation      | 50.1              |
|                 | <i>EWSR1-FLI1</i> | -                 | Fusion                 | -                 |
|                 | <i>FLI1-EWSR1</i> | -                 | Fusion                 | -                 |
|                 | <i>HIST1H2BD</i>  | M1?               | Translation_Start_Site | 48.1              |
|                 | <i>HIST1H3A</i>   | R129G             | Missense_Mutation      | 47.2              |
|                 | <i>INPP4A</i>     | G226V             | Missense_Mutation      | 42.2              |
|                 | <i>KDM5C</i>      | -                 | CNA_DeepDel            | -                 |
|                 | <i>KMT2C</i>      | P4726S            | Missense_Mutation      | 52.3              |
|                 | <i>KMT2D</i>      | R5214C            | Missense_Mutation      | 51.4              |
|                 | <i>MED12</i>      | P2135L            | Missense_Mutation      | 7.5               |
|                 | <i>MYC</i>        | -                 | CNA_Amp                | -                 |
|                 | <i>PREX2</i>      | L368V             | Missense_Mutation      | 24.6              |
|                 | <i>SMARCB1</i>    | R377H             | Missense_Mutation      | 48.8              |
|                 | <i>SOCS1</i>      | E91K              | Missense_Mutation      | 51.0              |
| <i>TP53</i>     | R213*             | Nonsense_Mutation | 100.0                  |                   |
| <i>TP53BP1</i>  | M521L             | Missense_Mutation | 50.7                   |                   |
| G401            | <i>AXL</i>        | A572T             | Missense_Mutation      | 43.8              |
|                 | <i>CYLD</i>       | Q729H             | Missense_Mutation      | 52.9              |
|                 | <i>ESR1</i>       | S137R             | Missense_Mutation      | 49.7              |
|                 | <i>SMARCB1</i>    | -                 | CNA_DeepDel            | -                 |
|                 | <i>TP53</i>       | C277F             | Missense_Mutation      | 2.8               |

|              |                                  |                |                   |       |
|--------------|----------------------------------|----------------|-------------------|-------|
| KP-MRT-NS    | <i>EIF1AX</i>                    | G8R            | Missense_Mutation | 51.3  |
|              | <i>EPHA5</i>                     | D20N           | Missense_Mutation | 57.6  |
|              | <i>ERCC4</i>                     | R670Q          | Missense_Mutation | 55.1  |
|              | <i>MSH2</i>                      | L811F          | Missense_Mutation | 44.3  |
|              | <i>MSH3</i>                      | A61_P63dup     | In_Frame_Ins      | 36.6  |
|              | <i>PLK2</i>                      | P52L           | Missense_Mutation | 52.5  |
|              | <i>RBM10</i>                     | V456M          | Missense_Mutation | 44.8  |
|              | <i>ROS1</i>                      | P1539L         | Missense_Mutation | 16.0  |
|              | <i>SMO</i>                       | V129I          | Missense_Mutation | 62.6  |
|              | <i>TP53</i>                      | R273C          | Missense_Mutation | 100.0 |
|              | <i>TP53</i>                      | -              | CNA_DeepDel       | -     |
|              | <i>TRAF2</i>                     | A168S          | Missense_Mutation | 52.1  |
|              | <i>WT1</i>                       | Q155H          | Missense_Mutation | 55.3  |
|              | <i>ZFHX3</i>                     | Q1740_Q1741del | In_Frame_Del      | 31.9  |
|              | <i>ZFHX3</i>                     | G3526_G3527dup | In_Frame_Ins      | 23.4  |
| KP-MRT-YM    | <i>ARID1A</i>                    | Y762*          | Nonsense_Mutation | 39.3  |
|              | <i>AXIN1</i>                     | D320N          | Missense_Mutation | 50.1  |
|              | <i>CTNNB1</i>                    | S33C           | Missense_Mutation | 42.5  |
|              | <i>DOT1L</i>                     | L974F          | Missense_Mutation | 47.6  |
|              | <i>EIF4A2</i>                    | I384T          | Missense_Mutation | 5.9   |
|              | <i>EP300</i>                     | H1261Y         | Missense_Mutation | 11.5  |
|              | <i>HGF</i>                       | R502L          | Missense_Mutation | 5.8   |
|              | <i>SMARCB1</i>                   | -              | CNA_DeepDel       | -     |
| KP-MRT-AN    | <i>TET1</i>                      | S573_S575dup   | In_Frame_Ins      | 22.2  |
|              | <i>AXIN1</i>                     | V600M          | Missense_Mutation | 46.6  |
|              | <i>CDH1</i>                      | P126L          | Missense_Mutation | 49.3  |
|              | <i>CDKN2AP14</i><br><i>ARF</i>   | -              | CNA_DeepDel       | -     |
|              | <i>CDKN2AP16</i><br><i>INK4A</i> | -              | CNA_DeepDel       | -     |
|              | <i>CDKN2B</i>                    | -              | CNA_DeepDel       | -     |
|              | <i>EP300</i>                     | G2218S         | Missense_Mutation | 99.9  |
|              | <i>KMT2A</i>                     | P3610L         | Missense_Mutation | 52.2  |
|              | <i>MET</i>                       | -              | CNA_Amp           | -     |
|              | <i>MYCN</i>                      | R357H          | Missense_Mutation | 5.1   |
|              | <i>NOTCH1</i>                    | R1296H         | Missense_Mutation | 49.8  |
|              | <i>PIK3CG</i>                    | P401L          | Missense_Mutation | 50.0  |
|              | <i>RAD51</i>                     | R150Q          | Missense_Mutation | 46.6  |
|              | <i>RPTOR</i>                     | P227L          | Missense_Mutation | 49.2  |
|              | <i>SLX4</i>                      | R481G          | Missense_Mutation | 50.4  |
| MSKMRT-14531 | <i>SMARCB1</i>                   | -              | CNA_DeepDel       | -     |
|              | <i>ZFHX3</i>                     | G3527del       | In_Frame_Del      | 72.2  |
|              | <i>AXIN1</i>                     | R417H          | Missense_Mutation | 52.9  |
|              | <i>EPHA5</i>                     | E106G          | Missense_Mutation | 46.6  |
|              | <i>FAT1</i>                      | L3781P         | Missense_Mutation | 49.3  |
|              | <i>HLA-A</i>                     | X338_splice    | Splice_Region     | 21.1  |
|              | <i>KMT2D</i>                     | G2141R         | Missense_Mutation | 45.9  |



|              |                |                |                   |      |
|--------------|----------------|----------------|-------------------|------|
|              | <i>MAP3K1</i>  | E1286V         | Missense_Mutation | 47.6 |
|              | <i>NCOA3</i>   | A1227T         | Missense_Mutation | 46.7 |
|              | <i>NF2</i>     | T581P          | Missense_Mutation | 51.9 |
|              | <i>SMARCB1</i> | -              | CNA_DeepDel       | -    |
|              | <i>MLH1</i>    | Q60*           | Nonsense_Mutation | 14.0 |
| MSKMRT-31222 | <i>SMARCB1</i> | -              | CNA_DeepDel       | -    |
|              | <i>ZFHX3</i>   | G3526_G3527del | In_Frame_Del      | 22.4 |

Abbreviations: VAF, variant allele frequency; CNA, copy number alteration; Del, deletion; Amp, amplification; Ins, insertion.
